# Supplementary material
Source: ML conference proceedings conference paper supplement (https://openaccess.thecvf.com/content/ICCV2021/html/Zhang_Rethinking_Noise_Synthesis_ICCV_2021_paper.html)
Supplement: Supplementary file 1 [file Zhang_Rethinking_Noise_Synthesis_ICCV_2021_supplemental.pdf]

# Supplementary Material

## 1. Details for noise parameters calibration

Here, we provide more details on noise parameters calibration for three smartphone cameras in the SIDD dataset. Following the DNG document [1], we estimate two noise parameters  $(\beta_1, \beta_2)$  for each sensor under the typical Poisson-Gaussian distribution. Specifically,  $\beta_1$  denotes the total gain factor inner the camera and  $\beta_2$  is the variance (Gaussian distribution) for the signal independent noise. For  $\beta_1$ , we first capture a series of *flat-field frames* by adjusting the uniform illumination and use the Photo Transfer method [2] to fit the linear relationship between the mean and variance of the *flat-field frames*. For  $\beta_2$ , we capture *black frames* for each ISO settings and remove their black levels. The variance parameter  $\beta_2$  can be estimated under the Gaussian distribution.

## 2. More qualitative results.

In fig. 1, we show more qualitative results from the ELD dataset. Our method can produce more textures than other methods. And, the color around the dark areas also can be preserved well.

## References

- [1] ADOBE SYSTEMS INCORPORATED. Digital negative (dng) specification. [https://www.adobe.com/content/dam/acom/en/products/photoshop/pdfs/dng\\_spec\\_1.4.0.0.pdf](https://www.adobe.com/content/dam/acom/en/products/photoshop/pdfs/dng_spec_1.4.0.0.pdf), 2012. 1
- [2] James R Janesick, Kenneth P Klaasen, and Tom Elliott. Charge-coupled-device charge-collection efficiency and the photon-transfer technique. *Optical engineering*, 26(10):261072, 1987. 1

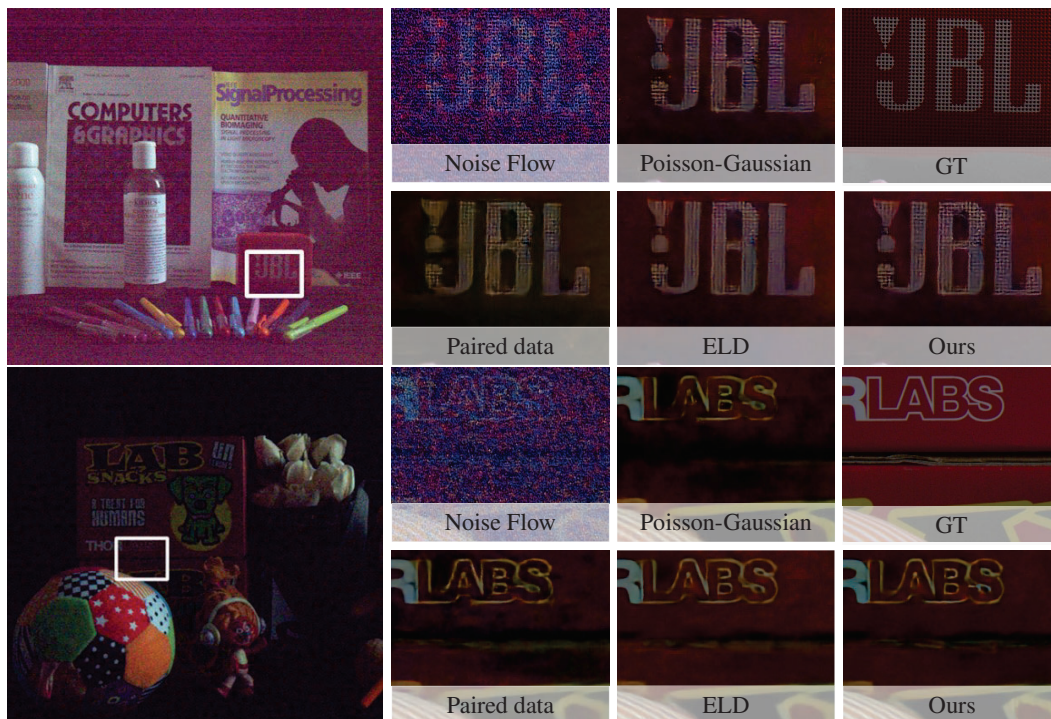

Figure 1. Qualitative results from the ELD dataset (**top**: scene 6, **bottom**: scene 1).
